# Supplementary material for: Salmonella Virulence Effector SopE and Host GEF ARNO Cooperate to Recruit and Activate WAVE to Trigger Bacterial Invasion
Source: PubMed Central journal article supplement (PMC3314957; doi:10.1016/j.chom.2012.01.006), 2012-02-16
Supplement: mmc1.pdf [file mmc1.pdf]

**Cell Host & Microbe, Volume 11**

**Supplemental Information**

***Salmonella* Virulence Effector SopE and Host  
GEF ARNO Cooperate to Recruit and Activate  
WAVE to Trigger Bacterial Invasion**

**Daniel Humphreys, Anthony Davidson, Peter J. Hume, and Vassilis Koronakis**

## Supplemental Experimental Procedures

### Plasmids and Recombinant Proteins

The following plasmids were generated by Invitrogen Gateway methodology: pcDNA3.1-SopE<sup>78-241</sup>-FLAG, pcDNA3-mRFP-Arf1, pcDNAcHA-Arf1, peCFP-C1-HSPC300, peCFP-C1-GGA3-GAT<sup>1-313</sup>, pGEX2T-GGA3-GAT<sup>1-313</sup> and peCFP-C1-ARNO. Point mutations were introduced into *arno* by site-directed mutagenesis. The vector pGST:SopE<sup>78-241</sup> has been described (Cain et al., 2004). The following were kindly provided to us; pRSETc-ARNO-2G (Prof Shamshad Cockcroft), pET-arf1 and pBB131 encoding the Arf family N-myristoyltransferase (Prof Martin Spiess). GST- and His-tagged proteins were expressed in *E. coli* Rosetta (Novagen) at 16°C before affinity purification (Cain et al., 2004).

### Antibodies

Antibodies were purchased from Abcam (Cdc42, ab64533; Rac1, ab33186; Arf1, ab58578; Arf6, ab81650; HSPC300, ab87449; ARNO, ab56510; Big1, ab72061; Big2, ab75001), Sigma (Abi1, A5106; Cyfip, P0092; Nap1, N3788; FLAG, F1804; HA agarose, A2095), Santa Cruz (HSP90, sc7947), GE Healthcare (GST, 27-4577-01) Covance (HA, MMS-101R) or were raised against recombinant peptides in rabbits by Diagnostics Scotland (WAVE2, amino acids 180-241).

### Mammalian Cell Culture and Transfections

Mammalian HeLa cells (ATCC-CCL-2) were routinely cultured in complete growth media consisting of Dulbecco's modified Eagle's medium (DMEM) supplemented with 10% (v/v) fetal bovine serum (FBS), 2mM L-glutamine, 200µg/ml<sup>-1</sup> streptomycin and 100Uml<sup>-1</sup> penicillin (37°C, 5% CO<sub>2</sub>). Transient transfection of HeLa cells by microporation was performed using the Neon Transfection System according to manufacturers instructions (Invitrogen). For RNA-interference small-interfering RNA (siRNA) from Qiagen against Arf1 (gene accession number NM\_001024228, Hs\_Arf1\_1 Seq: ACGTGGAAACCGTGGAGTACA, Hs\_Arf1\_11 Seq: AGGGAAGACCACGATCCTCTA, Hs\_Arf1\_10 Seq: CACGATCCTCTACAAGCTTAA), Rac1 (gene accession number NM\_006908, Hs\_RAC1\_5 Seq: ATGCATTTCTGGAGAATATA), ARNO (gene accession number

NM\_004228, Hs\_PSCD2\_2 Seq: CTGGTTTATCCTCACAGACAA, Hs\_PSCD2\_3 Seq: CACGCTGTTGGTAATCTTATT, Hs\_PSCD2\_6 Seq: ATGGAGGACGGCGTCTATGAA, Hs\_PSCD2\_7 Seq: CAGTAAGACCTTGCAACGGAA), GBF1 (gene accession number NM\_004193, Hs\_GBF1\_3 Seq: CAGGAGCATGTACATATGGAA, Hs\_GBF1\_4 Seq: AAGGAAGACCTTACTGATCTA), Big1 (gene accession number NM\_006421, Hs\_ARFGEF1\_5 Seq: ACTGTTGATCATATATCCCA, Hs\_ARFGEF1\_6 Seq: CGCGTTGATACTCAAGACCAA) Big2 (gene accession number NM\_006420, Hs\_ARFGEF2\_6 Seq: CGGCGGCTGGCTGTACAACCTTA, Hs\_ARFGEF2\_7 Seq: GTGGCGCTCGATGAAATTTAAA) or Allstars negative control siRNA (Qiagen), were transfected into HeLa cells with Oligofectamine™ transfection reagent (Invitrogen) according to manufacturer's instructions. Transfection mixture was replaced after 24h with complete growth medium and cells cultured 72 hours in total. RNAi efficiency was determined by EXPRESS One-Step SYBR® GreenER qRT-PCR according to manufacturers instructions (Invitrogen).

### **Protein Identification by Mass Spectrometry**

Proteins were separated on 9% Bis-Tris gels in MOPS pH7.6 running buffer. Excised protein bands from colloidal Coomassie Blue G250-stained gels were reduced, carboxymethylated, digested using trypsin and identified by electrospray ionization liquid chromatography mass spectrometry (Mass spectrometry service, Cambridge Centre for Proteomics, University of Cambridge). The MS fragmentation data was used to search the National Center for Biotechnology Information database (NCBI) using the MASCOT search engine (<http://www.matrixscience.com>). Probability-based MASCOT scores were used to evaluate identifications. Only matches with  $p < 0.05$  for random occurrence were considered significant.

**Table S1. Proteins Recruited from Extract to Membranes by SopE**

The table lists identified proteins recruited by SopE-decorated PL beads from extract with added GTP $\gamma$ S. The data corresponds to the gel bands (indicated by orange circles) and mass spectrometry shown in Figure 1A. Probability-based MASCOT scores were used to evaluate identifications. Only matches with  $p < 0.05$  for random occurrence were considered significant.

| <b>Gel Band<br/>Figure 1A</b> | <b>Protein Name</b>                                     | <b>Peptide<br/>Coverage (%)</b> | <b>Mascot Score</b>         | <b>MW (kD)</b> |
|-------------------------------|---------------------------------------------------------|---------------------------------|-----------------------------|----------------|
| Cyfip                         | cytoplasmic<br>FMR1<br>interacting<br>protein 1/2       | 53.3/<br>44.4                   | 3044/2798                   | ~147           |
| Nap1                          | NCK-<br>associated<br>protein 1                         | 52.6                            | 2579                        | ~129           |
| WAVE                          | WASP family<br>Veroprolin<br>homologue<br>member 1/2/3  | 20.8/7.6/32.4                   | 452/197/559                 | ~62/<br>~54/51 |
| Abi                           | abl-interactor 2                                        | 25.8                            | 549                         | ~52            |
| N-WASP                        | Neuronal-<br>wiskott-<br>Aldrich<br>syndrome<br>protein | 14.2                            | 297                         | ~53            |
| Cdc42                         | cell division<br>cycle 42                               | 43.5                            | 386                         | ~22            |
| Rac                           | ras-related C3<br>botulinum<br>toxin substrate<br>1/2/3 | 67.4/36.5/46.9                  | 347/314/436                 | ~22            |
| Arfs                          | ADP-<br>ribosylation<br>factor<br>1/2/3/4/5/6           | 80.6/59.7/<br>80.1/45/60/30.3   | 968/831/971/<br>427/763/265 | ~20            |
| actin                         | actin                                                   | 42.1                            | 561                         | ~40            |

**Figure S1**

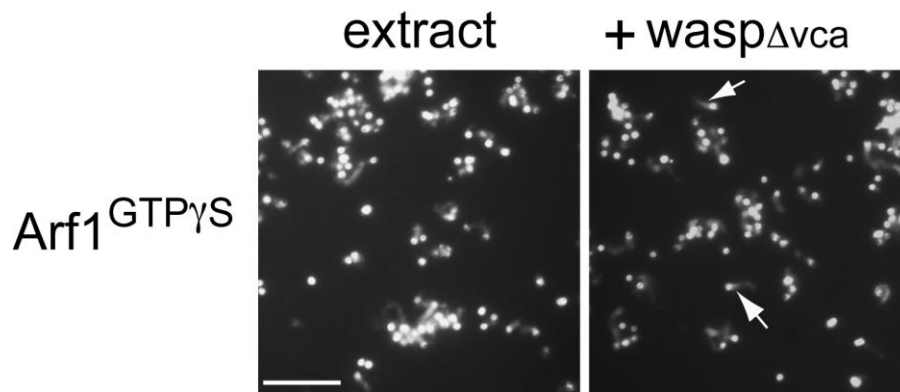

**Figure S1. Arf1 Activation of WRC**

Fluorescence microscopy of rhodamine-actin assembly on the PL beads with anchored active myristoylated Arf1<sup>GTP $\gamma$ S</sup> in extract with or without wasp $\Delta$ vca. Scale bar 15 $\mu$ m. Control experiment for Figure 2B.

**Figure S2**

**A**

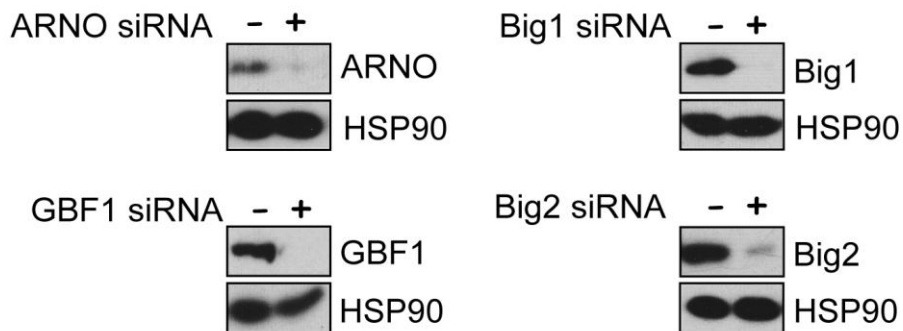

**B**

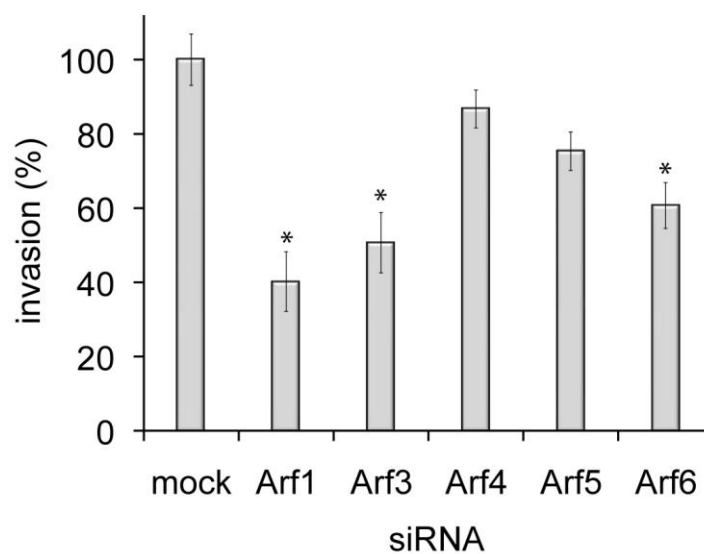

**Figure S2. Arf GEF Depletion and Arf GTPase Promotion of *Salmonella***

**Invasion**

(A) Arf GEF depletion by siRNA transfection. HeLa cells were transfected with either ARNO, GBF1, Big1 or Big2 siRNA 72h before analysis by SDS-PAGE and immunoblotting with indicated antibodies to Arf GEFs and HSP90 as control (right).

(B) Influence of Arf GTPase depletion on *Salmonella* invasion. HeLa cells were transfected with either mock or indicated Arf siRNA 72h before infection with wt *Salmonella* (15 min). To quantify *Salmonella* invasion, washed infected cells were incubated with gentamicin for 2h to kill extracellular bacteria and invasion quantified by colony counts. Asterisks indicate a significant difference from mock (p < 0.05, ANOVA; n=3). Error bars represent +/- SEM. Knockdowns were quantified by qRT-PCR, data not shown. Experiments correspond to Figure 4.

FigureS3

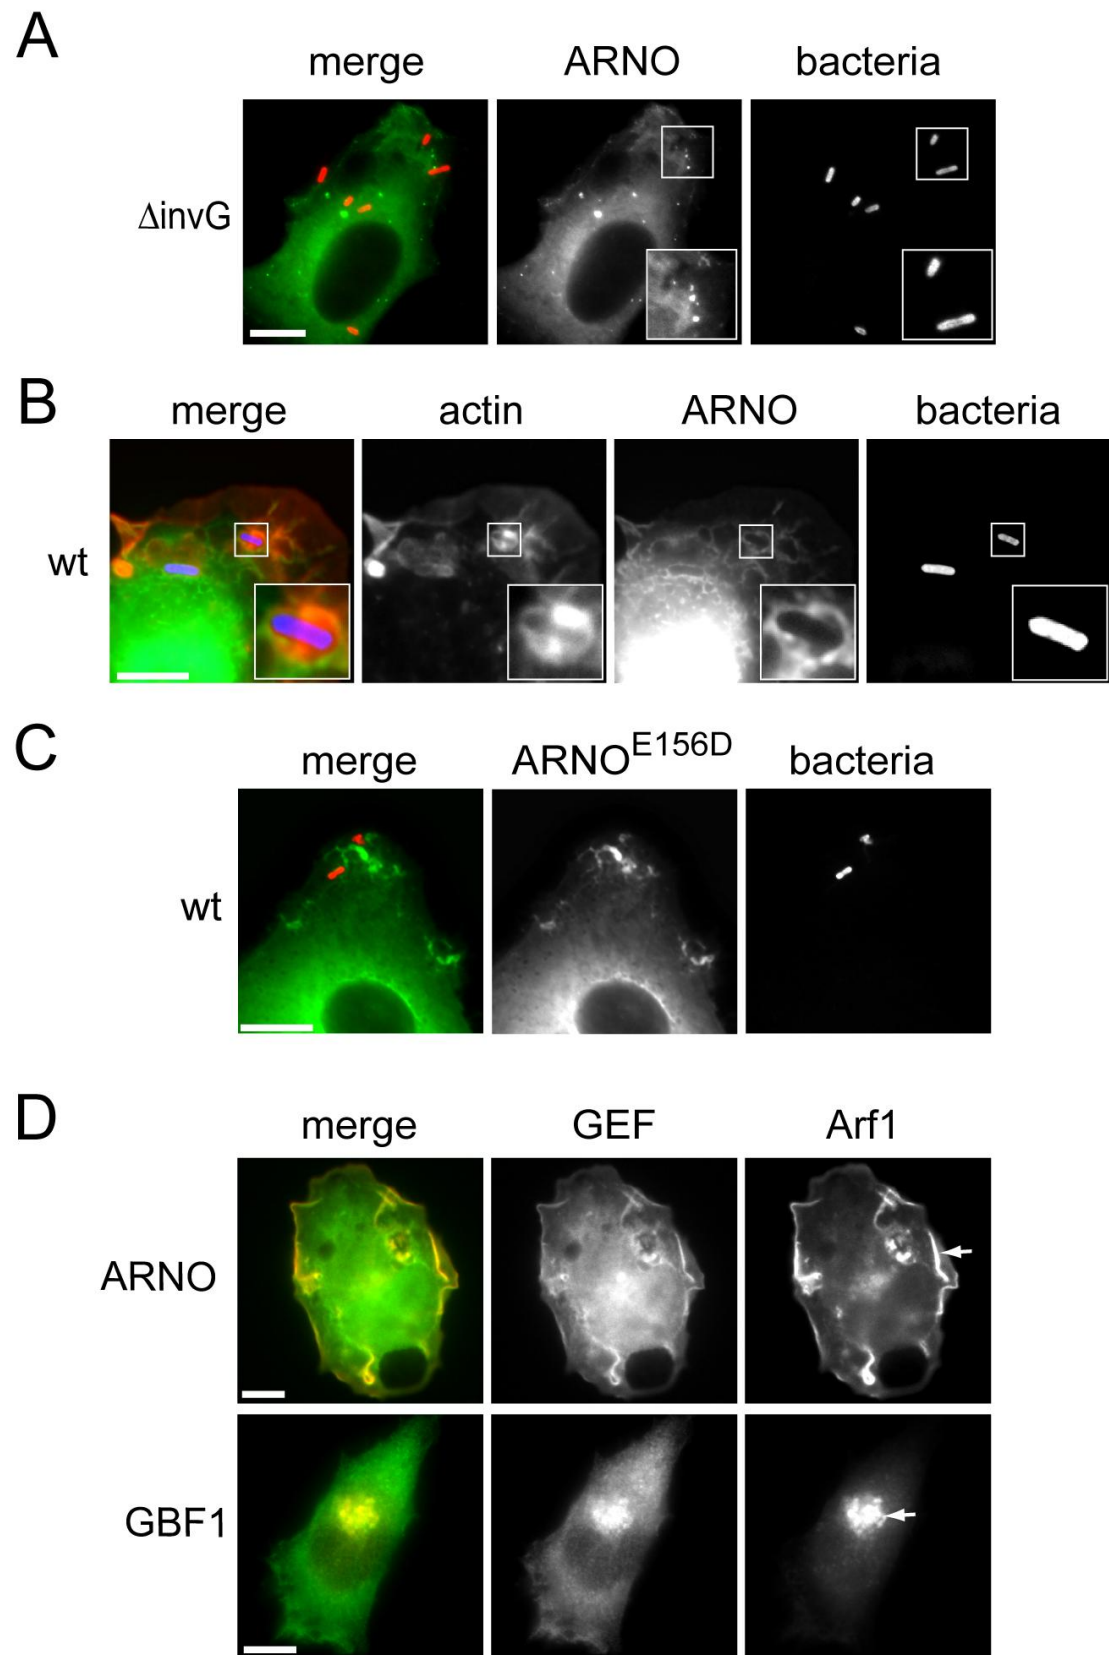

### Figure S3. ARNO Localization and Arf1 Recruitment to the Plasma Membrane

(A) Localization of ARNO during infection with *ΔinvG Salmonella*. Like Figure 5a, HeLa cells expressing <sup>CFP</sup>ARNO (ARNO) were infected for 15 min with fluorescently-labelled *ΔinvG Salmonella* (bacteria). Scale bar 8μm. Insets show magnified area.

(B) Localization of ARNO and actin during *Salmonella* invasion. HeLa cells expressing <sup>CFP</sup>ARNO (ARNO) were infected for 15 min with fluorescently-labelled wt *Salmonella* (bacteria) as indicated (left) then stained with TexasRed-phalloidin to label actin. Insets magnify ARNO and actin co-localization at a pathogen containing macropinosome.

(C) Macropinosome formation by catalytically inactive ARNO during *Salmonella* invasion. HeLa cells expressing <sup>CFP</sup>ARNO<sup>E156D</sup> (ARNO<sup>E156D</sup>) were infected for 15 min with fluorescently-labelled wt *Salmonella* (bacteria) as indicated (left).

(D) Influence of Arf GEF expression on Arf1 localization. HeLa cells expressing Arf1<sup>RFP</sup> together with <sup>CFP</sup>ARNO or <sup>CFP</sup>GBF1. Arrows indicate enriched Arf1 localization. Scale bars 8μm. Experiments correspond to Figure 5.



**Table S2. Proteins Recruited from Extract to Membranes by ARNO**

The table lists identified proteins recruited by ARNO-decorated PL beads from extract with added GTP $\gamma$ S. The data corresponds to the gel bands (indicated by orange circles) and mass spectrometry shown in Figure 6A. Probability-based MASCOT scores were used to evaluate identifications. Only matches with  $p < 0.05$  for random occurrence were considered significant.

| <b>Gel Band<br/>Figure 6A</b> | <b>Protein Name</b>                                     | <b>Peptide<br/>Coverage (%)</b> | <b>Mascot Score</b>         | <b>MW (kD)</b> |
|-------------------------------|---------------------------------------------------------|---------------------------------|-----------------------------|----------------|
| Cyfp                          | cytoplasmic<br>FMR1<br>interacting<br>protein 1/2       | 47/<br>39                       | 3509/2637                   | ~147           |
| Nap1                          | NCK-<br>associated<br>protein 1                         | 43                              | 2573                        | ~129           |
| WAVE                          | WASP family<br>Veroprolin<br>homologue<br>member 1/2/3  | 28/6/30                         | 870/136/831                 | ~55            |
| Abi                           | abl-interactor<br>1/2                                   | 24/27                           | 358/534                     | ~52            |
| N-WASP                        | Neuronal-<br>wiskott-<br>Aldrich<br>syndrome<br>protein | 15                              | 303                         | ~53            |
| Cdc42                         | cell division<br>cycle 42                               | 41                              | 223                         | ~22            |
| Rac                           | ras-related C3<br>botulinum<br>toxin substrate<br>3     | 22                              | 166                         | ~22            |
| Arfs                          | ADP-<br>ribosylation<br>factor<br>1/2/3/4/5/6           | 59/75/<br>79/58/58/19           | 824/952/785/<br>630/608/180 | ~20            |
| actin                         | actin                                                   | 22.1                            | 254                         | ~40            |

**Figure S4**

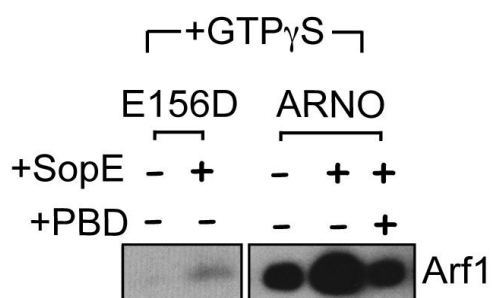

**Figure S4. SopE Promotion of Arf1 Recruitment**

Arf1 recruitment to phospholipid bilayers by SopE in the presence of ARNO. PL beads decorated with either catalytically-inactive ARNO (E156D) or wild-type ARNO with or without SopE were isolated from brain extract containing GTP $\gamma$ S in the presence or absence of the Rho GTPase inhibitor PBD. Recruited proteins were extracted before analysis by SDS-PAGE and immunoblotting with Arf1 antibodies (right). Control experiment for Figures 6 and 7.

The left panel demonstrates that catalytically-inactive ARNO (E156D) cannot recruit Arf1 but Arf1 recruitment is observed when SopE and E156D are combined. The right panel re-confirms that Arf1 recruitment is increased when SopE and ARNO are together (also shown in Figure 7A). The increase is blocked by PBD. These results indicate that SopE promotes Arf1 recruitment via activation of Rho GTPases and not via enhanced ARNO GEF activity in the presence of SopE or WRC.

**Figure S5**

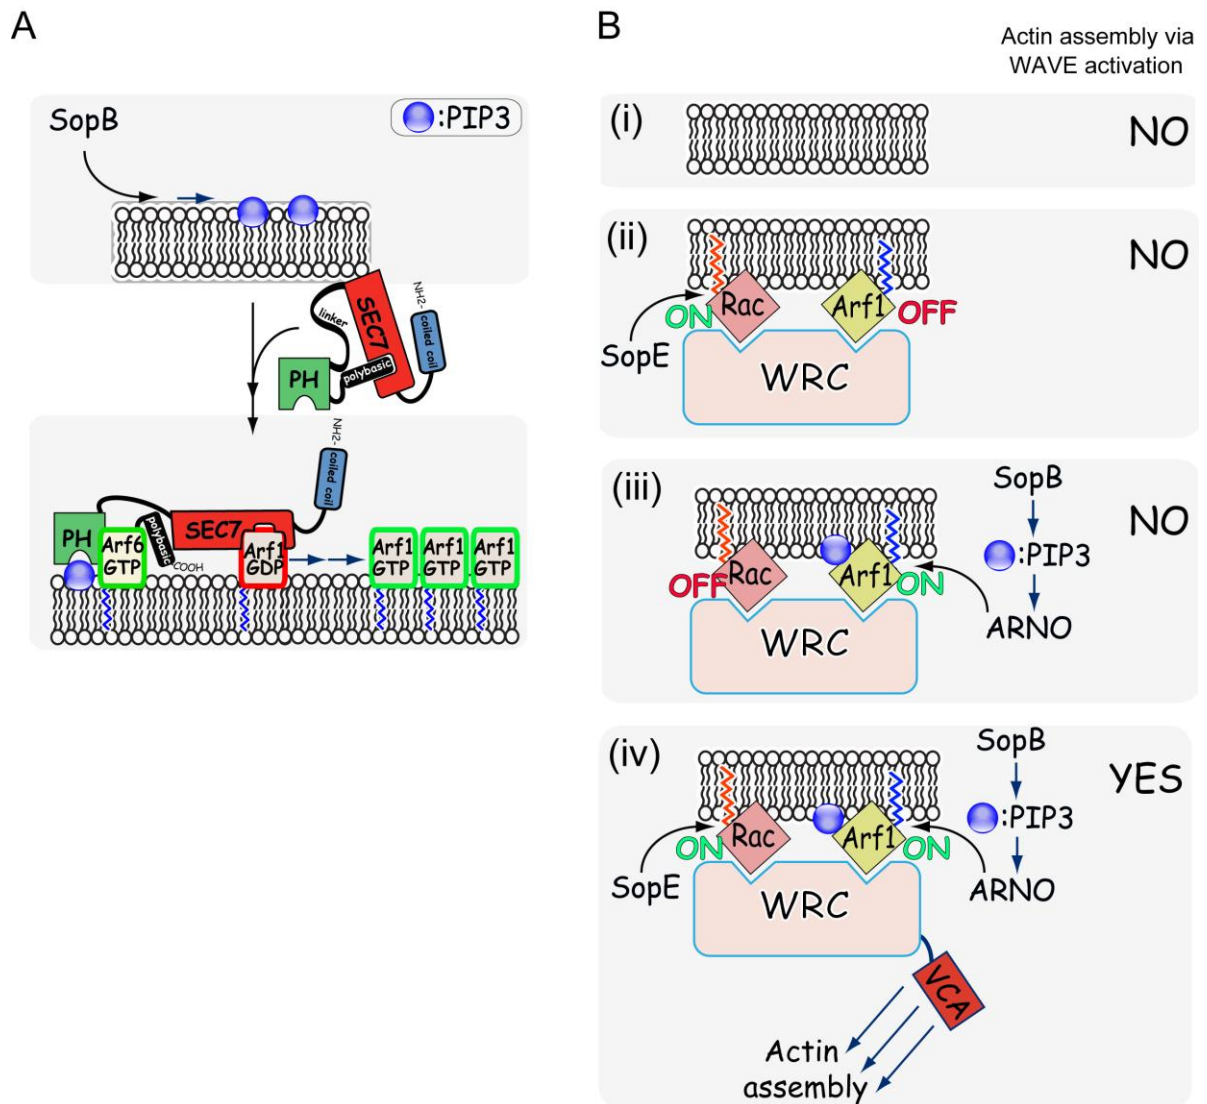

**Figure S5. Recruitment of ARNO, which Cooperates with SopE to Activate WRC**

(A) ARNO recruitment by *Salmonella*. ARNO adopts an autoinhibited conformation (top) where the polybasic motif and linker mask catalytic Sec7 domain (Donaldson and Jackson, 2011). ARNO recruitment to the plasma membrane depends upon its PH domain that binds the phosphoinositide PIP3 and Arf6 (Cohen et al., 2007; Klarlund et al., 2000; Macia et al., 2000). *Salmonella* SopB is known to trigger generation of PIP3 at invasion ruffles (Mallo et al., 2008), and we show that SopB-induced PIP3 production (top) and ARNO interactions with PIP3 and Arf6 are crucial for *Salmonella* to recruit ARNO and facilitate Arf1 activation (bottom). Corresponds to the data in Figure 5B and 5C.

(B) Cooperation of SopE and ARNO in recruitment and activation of WRC.

(i) Neither recruitment nor activation of WRC at the membrane is observed in the absence of active Arf1 and Rac1, which blocks actin assembly.

(ii) SopE activation of Rho GTPases such as Rac1 (ON) triggers recruitment but not activation of WRC, as Arf1 remains inactive (OFF), so no WRC-dependent actin assembly occurs.

(iii) SopB promotes recruitment of ARNO that activates Arf1 (ON) thereby triggering recruitment but not activation of WRC, as Rac1 remains inactive (OFF), which prohibits robust WRC-dependent actin assembly.

(iv) SopB promotes recruitment of ARNO which cooperates with SopE to activate (ON) Arf1 and Rac1, respectively, thereby triggering recruitment and activation of WRC for initiation of actin assembly via the WAVE VCA domain. Corresponds to the data in Figure 7.
